# Supplementary material for: Reliability and validity of a new physical activity questionnaire for India
Source: PubMed Central journal article supplement (PMC4498505; doi:10.1186/s12966-015-0196-2), 2015-03-18
Supplement: 12966_2015_196_MOESM1_ESM.pdf [file 12966_2015_196_MOESM1_ESM.pdf]

## MDRF PHYSICAL ACTIVITY QUESTIONNAIRE (MPAQ)

Name : \_\_\_\_\_

Volunteer code

Age:    yrs    Sex: M  F

Interview        
Date                  Month                  Year

Height:    .  cms    Weight:    .  Kgs    Body fat:   .  %

BP:    /

*In this section, you will be asked about the time spent doing different types of physical activity. Please answer these questions even if you do not consider yourself to be a physically active person*

**SECTION I – PHYSICAL ACTIVITY AT WORK:** *This section applies only to those who are employed and students. Housewives, retired people and those who are unemployed (for 1 year) can skip this section and go to (Q. no 13ai).*

|                                                                          |                                                                                                                                      |                                                                                                                                                            |
|--------------------------------------------------------------------------|--------------------------------------------------------------------------------------------------------------------------------------|------------------------------------------------------------------------------------------------------------------------------------------------------------|
| 1                                                                        | Does your work involve Seasonal Activity                                                                                             | Yes 1 <input type="checkbox"/><br>No 2 <input type="checkbox"/>                                                                                            |
| 2a                                                                       | Specify Primary or Full Time Occupation: _____                                                                                       |                                                                                                                                                            |
| 2b                                                                       | Specify Seasonal* or Part-time Occupation**, if any _____ (Write 99 if not applicable)                                               |                                                                                                                                                            |
| Indicate your duration of occupation <b>per year</b>                     |                                                                                                                                      |                                                                                                                                                            |
| 3a                                                                       | Full Time Occupation<br>Months <input type="text"/> <input type="text"/> /Year                                                       | 3b      Seasonal* / Part-Time Occupation**<br>Months <input type="text"/> <input type="text"/> Year                                                        |
| Indicate your duration of occupation <b>per Week</b>                     |                                                                                                                                      |                                                                                                                                                            |
| 4a                                                                       | Full Time Occupation<br>Days <input type="text"/> / Week <b>OR</b><br>Days <input type="text"/> <input type="text"/> / Month         | 4b      Seasonal* /Part-Time Occupation**<br>Days <input type="text"/> / Week <b>OR</b><br>Days <input type="text"/> <input type="text"/> / Month          |
| On an average, how many hours <b>per day</b> do you spend at work place? |                                                                                                                                      |                                                                                                                                                            |
| 5a                                                                       | Full Time Occupation<br><input type="text"/> <input type="text"/> <input type="text"/> <input type="text"/> / Day<br>Hours : Minutes | 5b      Seasonal* / Part Time Occupation**<br><input type="text"/> <input type="text"/> <input type="text"/> <input type="text"/> / Day<br>Hours : Minutes |

\*Seasonal                      - Typically reflects changes in occupation due to monsoon or winter  
\*\*Part-time                    - The second job

| At the <u>work place</u> , how many hours per day do you spend on the following: |                                                                                                                                                       |                                                                                       |                                           |                                                                                                                                                       |                                                                                       |
|----------------------------------------------------------------------------------|-------------------------------------------------------------------------------------------------------------------------------------------------------|---------------------------------------------------------------------------------------|-------------------------------------------|-------------------------------------------------------------------------------------------------------------------------------------------------------|---------------------------------------------------------------------------------------|
| Full Time Occupation / Day                                                       |                                                                                                                                                       | Duration (Hrs: mins)                                                                  | Seasonal* / Part –Time Occupation** / Day |                                                                                                                                                       | Duration (Hrs: mins)                                                                  |
| 6a                                                                               | Skilled occupational activities – (professional activities like crèche care taker, heavy vehicle driving, tailoring, laundering, house-keeping etc.,) | <input type="text"/> <input type="text"/> : <input type="text"/> <input type="text"/> | 6b                                        | Skilled occupational activities - (professional activities like crèche care taker, heavy vehicle driving, tailoring, laundering, house-keeping etc.,) | <input type="text"/> <input type="text"/> : <input type="text"/> <input type="text"/> |
| 7a                                                                               | An activity more strenuous than walking (like planting, manual agricultural work, carrying heavy load, professional sports person etc.,)              | <input type="text"/> <input type="text"/> : <input type="text"/> <input type="text"/> | 7b                                        | An activity more strenuous than walking (like planting, manual agricultural work, carrying heavy load, professional sports person etc.,)              | <input type="text"/> <input type="text"/> : <input type="text"/> <input type="text"/> |
| 8a                                                                               | Standing                                                                                                                                              | <input type="text"/> <input type="text"/> : <input type="text"/> <input type="text"/> | 8b                                        | Standing                                                                                                                                              | <input type="text"/> <input type="text"/> : <input type="text"/> <input type="text"/> |
| 9a                                                                               | Walking at varying paces without a load                                                                                                               | <input type="text"/> <input type="text"/> : <input type="text"/> <input type="text"/> | 9b                                        | Walking at varying paces without a load                                                                                                               | <input type="text"/> <input type="text"/> : <input type="text"/> <input type="text"/> |
| 10a                                                                              | Climbing stairs / Walking uphill                                                                                                                      | <input type="text"/> <input type="text"/> : <input type="text"/> <input type="text"/> | 10b                                       | Climbing stairs / Walking uphill                                                                                                                      | <input type="text"/> <input type="text"/> : <input type="text"/> <input type="text"/> |
| 11a                                                                              | Light vehicle driving during office hours                                                                                                             | <input type="text"/> <input type="text"/> : <input type="text"/> <input type="text"/> | 11b                                       | Light vehicle driving during office hours                                                                                                             | <input type="text"/> <input type="text"/> : <input type="text"/> <input type="text"/> |
| 12a                                                                              | Sitting (Office work like typing, reading, computer work)                                                                                             | <input type="text"/> <input type="text"/> : <input type="text"/> <input type="text"/> | 12b                                       | Sitting (Office work like typing, reading, computer work)                                                                                             | <input type="text"/> <input type="text"/> : <input type="text"/> <input type="text"/> |

\*Seasonal - Typically reflects changes in occupation due to monsoon or winter

\*\*Part-time - The second job

**SECTION II – PHYSICAL ACTIVITY –GENERAL WEEKDAY (Other than work related)**  
**In this section you will be asked about physical activity in general (other than work related) like domestic chores, personal care etc.,**

| Q.no | <b>Weekday activity - General</b>                                                                |                                                                         |       |        |         |        |       | 13  | Do you have seasonal* changes in activity?<br>Yes-1 No -2 : <input type="checkbox"/> |       |        |         |  |
|------|--------------------------------------------------------------------------------------------------|-------------------------------------------------------------------------|-------|--------|---------|--------|-------|-----|--------------------------------------------------------------------------------------|-------|--------|---------|--|
|      |                                                                                                  |                                                                         |       |        |         |        |       | 14  | If yes, for how many months does this change apply? <input type="text"/>             |       |        |         |  |
|      | <b>Activity</b>                                                                                  | <b>Duration / day (Hrs: mins)</b>                                       | Daily | Weekly | Monthly | Yearly | Never |     | <b>Duration / day (Hrs: mins)</b>                                                    | Daily | Weekly | Monthly |  |
| 15a  | Sleeping (Regular hours of sleep usually at night) and Nap(short break of sleep - day time)      | Night<br><input type="text"/> <input type="text"/> <input type="text"/> |       |        |         |        |       | 15b | Night<br><input type="text"/> <input type="text"/> <input type="text"/>              |       |        |         |  |
| 16a  |                                                                                                  | Day<br><input type="text"/> <input type="text"/> <input type="text"/>   |       |        |         |        |       | 16b | Day<br><input type="text"/> <input type="text"/> <input type="text"/>                |       |        |         |  |
| 17a  | Personal care - brushing, toilet , showering, dressing etc.,                                     | <input type="text"/> <input type="text"/> <input type="text"/>          |       |        |         |        |       | 17b | <input type="text"/> <input type="text"/> <input type="text"/>                       |       |        |         |  |
| 18a  | Eating (Include all meals, snacks & coffee/tea drinks ) except that reported in the work section | <input type="text"/> <input type="text"/> <input type="text"/>          |       |        |         |        |       | 18b | <input type="text"/> <input type="text"/> <input type="text"/>                       |       |        |         |  |
| 19a  | Cooking – (including pre-preparation of meals, snacks and beverages)                             | <input type="text"/> <input type="text"/> <input type="text"/>          |       |        |         |        |       | 19b | <input type="text"/> <input type="text"/> <input type="text"/>                       |       |        |         |  |
| 20a  | Collecting water/ wood (by manual means like well, hand pumping)                                 | <input type="text"/> <input type="text"/> <input type="text"/>          |       |        |         |        |       | 20b | <input type="text"/> <input type="text"/> <input type="text"/>                       |       |        |         |  |
| 21a  | Climbing steps / walking uphill                                                                  | <input type="text"/> <input type="text"/> <input type="text"/>          |       |        |         |        |       | 21b | <input type="text"/> <input type="text"/> <input type="text"/>                       |       |        |         |  |
| 22a  | Non-mechanized domestic chores (like -sweeping, washing clothes and dishes by hand)              | <input type="text"/> <input type="text"/> <input type="text"/>          |       |        |         |        |       | 22b | <input type="text"/> <input type="text"/> <input type="text"/>                       |       |        |         |  |
| 23a  | Toddler care (age < 5 years includes feeding, bathing and playing etc.,)                         | <input type="text"/> <input type="text"/> <input type="text"/>          |       |        |         |        |       | 23b | <input type="text"/> <input type="text"/> <input type="text"/>                       |       |        |         |  |

\*Seasonal - Typically reflects changes in occupation due to monsoon or winter  
 \*\*Part-time - The second job

**SECTION III – PHYSICAL ACTIVITY- Commutation (WEEK DAYS)**  
**In this section you will be asked about the usual way you travel to and from places like self-driving, cycling, commuting to different places etc.,**

| Q.no            | <b>Weekday activity - Transport</b>                             | 24                                        | Do you have seasonal* changes in activity?<br>Yes-1 No -2 : <input type="checkbox"/> |               |                |               |              |                                   |                                           |              |               |                |  |
|-----------------|-----------------------------------------------------------------|-------------------------------------------|--------------------------------------------------------------------------------------|---------------|----------------|---------------|--------------|-----------------------------------|-------------------------------------------|--------------|---------------|----------------|--|
|                 |                                                                 | 25                                        | If yes, for how many months does this change apply? <input type="text"/>             |               |                |               |              |                                   |                                           |              |               |                |  |
| <b>Activity</b> |                                                                 | <b>Duration / day (Hrs: mins)</b>         | <b>Daily</b>                                                                         | <b>Weekly</b> | <b>Monthly</b> | <b>Yearly</b> | <b>Never</b> | <b>Duration / day (Hrs: mins)</b> |                                           | <b>Daily</b> | <b>Weekly</b> | <b>Monthly</b> |  |
| 26a             | Self driving–work and other places (car/bike/scooter)           | <input type="text"/> <input type="text"/> |                                                                                      |               |                |               |              | 26b                               | <input type="text"/> <input type="text"/> |              |               |                |  |
| 27a             | Commuting by bus / auto /pillion rider (to work & other places) | <input type="text"/> <input type="text"/> |                                                                                      |               |                |               |              | 27b                               | <input type="text"/> <input type="text"/> |              |               |                |  |
| 28a             | Travel by cycling (excludes cycling as an exercise)             | <input type="text"/> <input type="text"/> |                                                                                      |               |                |               |              | 28b                               | <input type="text"/> <input type="text"/> |              |               |                |  |
| 29a             | Walking to and fro places (excludes walking as an exercise)     | <input type="text"/> <input type="text"/> |                                                                                      |               |                |               |              | 29b                               | <input type="text"/> <input type="text"/> |              |               |                |  |

**SECTION IV – PHYSICAL ACTIVITY- LEISURE (WEEK DAYS)**  
**This section excludes the work and transport activities that you have already mentioned. You will be asked about sports, fitness and recreational activities (leisure) like watching TV, chatting, reading etc**

| Q.no                    | <b>Weekday activity - Leisure</b>                          | 30                                        | Do you have seasonal* changes in activity?<br>Yes-1 No -2 : <input type="checkbox"/> |               |                |               |              |                                   |                                           |              |               |                |  |
|-------------------------|------------------------------------------------------------|-------------------------------------------|--------------------------------------------------------------------------------------|---------------|----------------|---------------|--------------|-----------------------------------|-------------------------------------------|--------------|---------------|----------------|--|
|                         |                                                            | 31                                        | If yes, for how many months does this change apply? <input type="text"/>             |               |                |               |              |                                   |                                           |              |               |                |  |
| <b>Activity - Light</b> |                                                            | <b>Duration / day (Hrs: mins)</b>         | <b>Daily</b>                                                                         | <b>Weekly</b> | <b>Monthly</b> | <b>Yearly</b> | <b>Never</b> | <b>Duration / day (Hrs: mins)</b> |                                           | <b>Daily</b> | <b>Weekly</b> | <b>Monthly</b> |  |
| 32a                     | Slow walking (Example- Shopping, going to a worship place) | <input type="text"/> <input type="text"/> |                                                                                      |               |                |               |              | 32b                               | <input type="text"/> <input type="text"/> |              |               |                |  |
| 33a                     | Playing a musical Instrument/ Singing (as a hobby)         | <input type="text"/> <input type="text"/> |                                                                                      |               |                |               |              | 33b                               | <input type="text"/> <input type="text"/> |              |               |                |  |
| 34a                     | Others specify _____                                       | <input type="text"/> <input type="text"/> |                                                                                      |               |                |               |              | 34b                               | <input type="text"/> <input type="text"/> |              |               |                |  |
| 35a                     | Others specify _____                                       | <input type="text"/> <input type="text"/> |                                                                                      |               |                |               |              | 35b                               | <input type="text"/> <input type="text"/> |              |               |                |  |

\*Seasonal - Typically reflects changes in occupation due to monsoon or winter  
 \*\*Part-time - The second job

| <b>Activity -Moderate</b>  |                                                                                                        | <b>Duration / day<br/>(Hrs: mins)</b>                                               | Daily | Weekly | Monthly | Yearly | Never |  | <b>Duration / day<br/>(Hrs: mins)</b> | Daily                                                                               | Weekly | Monthly |  |
|----------------------------|--------------------------------------------------------------------------------------------------------|-------------------------------------------------------------------------------------|-------|--------|---------|--------|-------|--|---------------------------------------|-------------------------------------------------------------------------------------|--------|---------|--|
| 36a                        | Brisk walking as an exercise                                                                           | <input type="text"/> <input type="text"/> <input type="text"/> <input type="text"/> |       |        |         |        |       |  | 36b                                   | <input type="text"/> <input type="text"/> <input type="text"/> <input type="text"/> |        |         |  |
| 37a                        | Cricket                                                                                                | <input type="text"/> <input type="text"/> <input type="text"/> <input type="text"/> |       |        |         |        |       |  | 37b                                   | <input type="text"/> <input type="text"/> <input type="text"/> <input type="text"/> |        |         |  |
| 38a                        | Jogging / slow running                                                                                 | <input type="text"/> <input type="text"/> <input type="text"/> <input type="text"/> |       |        |         |        |       |  | 38b                                   | <input type="text"/> <input type="text"/> <input type="text"/> <input type="text"/> |        |         |  |
| 39a                        | Dancing / aerobics/ yoga (asanas)                                                                      | <input type="text"/> <input type="text"/> <input type="text"/> <input type="text"/> |       |        |         |        |       |  | 39b                                   | <input type="text"/> <input type="text"/> <input type="text"/> <input type="text"/> |        |         |  |
| 40a                        | Swimming                                                                                               | <input type="text"/> <input type="text"/> <input type="text"/> <input type="text"/> |       |        |         |        |       |  | 40b                                   | <input type="text"/> <input type="text"/> <input type="text"/> <input type="text"/> |        |         |  |
| 41a                        | Cycling including static cycling                                                                       | <input type="text"/> <input type="text"/> <input type="text"/> <input type="text"/> |       |        |         |        |       |  | 41b                                   | <input type="text"/> <input type="text"/> <input type="text"/> <input type="text"/> |        |         |  |
| 42a                        | Others specify<br>_____                                                                                | <input type="text"/> <input type="text"/> <input type="text"/> <input type="text"/> |       |        |         |        |       |  | 42b                                   | <input type="text"/> <input type="text"/> <input type="text"/> <input type="text"/> |        |         |  |
| 43a                        | Others specify<br>_____                                                                                | <input type="text"/> <input type="text"/> <input type="text"/> <input type="text"/> |       |        |         |        |       |  | 43b                                   | <input type="text"/> <input type="text"/> <input type="text"/> <input type="text"/> |        |         |  |
| <b>Activity - Vigorous</b> |                                                                                                        | <b>Duration / day<br/>(Hrs: mins)</b>                                               | Daily | Weekly | Monthly | Yearly | Never |  | <b>Duration / day<br/>(Hrs: mins)</b> | Daily                                                                               | Weekly | Monthly |  |
| 44a                        | Conditioning exercises (like muscle strengthening exercises, using a rowing machine, free weights etc. | <input type="text"/> <input type="text"/> <input type="text"/> <input type="text"/> |       |        |         |        |       |  | 44b                                   | <input type="text"/> <input type="text"/> <input type="text"/> <input type="text"/> |        |         |  |
| 45a                        | Running / sprinting                                                                                    | <input type="text"/> <input type="text"/> <input type="text"/> <input type="text"/> |       |        |         |        |       |  | 45b                                   | <input type="text"/> <input type="text"/> <input type="text"/> <input type="text"/> |        |         |  |
| 46a                        | Football, basket ball, tennis, volleyball etc.,                                                        | <input type="text"/> <input type="text"/> <input type="text"/> <input type="text"/> |       |        |         |        |       |  | 46b                                   | <input type="text"/> <input type="text"/> <input type="text"/> <input type="text"/> |        |         |  |
| 47a                        | Others specify<br>_____                                                                                | <input type="text"/> <input type="text"/> <input type="text"/> <input type="text"/> |       |        |         |        |       |  | 47b                                   | <input type="text"/> <input type="text"/> <input type="text"/> <input type="text"/> |        |         |  |
| 48a                        | Others specify<br>_____                                                                                | <input type="text"/> <input type="text"/> <input type="text"/> <input type="text"/> |       |        |         |        |       |  | 48b                                   | <input type="text"/> <input type="text"/> <input type="text"/> <input type="text"/> |        |         |  |

\*Seasonal - Typically reflects changes in occupation due to monsoon or winter  
\*\*Part-time - The second job

|     | Activity -Sedentary                                  | Duration / day (Hrs: mins)                                                          | Daily | Weekly | Monthly | Yearly | Never |     | Duration / day (Hrs: mins)                                                          | Daily | Weekly | Monthly |
|-----|------------------------------------------------------|-------------------------------------------------------------------------------------|-------|--------|---------|--------|-------|-----|-------------------------------------------------------------------------------------|-------|--------|---------|
| 49a | Watching TV                                          | <input type="text"/> <input type="text"/> <input type="text"/> <input type="text"/> |       |        |         |        |       | 49b | <input type="text"/> <input type="text"/> <input type="text"/> <input type="text"/> |       |        |         |
| 50a | Bhajans /prayer                                      | <input type="text"/> <input type="text"/> <input type="text"/> <input type="text"/> |       |        |         |        |       | 50b | <input type="text"/> <input type="text"/> <input type="text"/> <input type="text"/> |       |        |         |
| 51a | Watching movies/shows/ concerts                      | <input type="text"/> <input type="text"/> <input type="text"/> <input type="text"/> |       |        |         |        |       | 51b | <input type="text"/> <input type="text"/> <input type="text"/> <input type="text"/> |       |        |         |
| 52a | Yoga as relaxation                                   | <input type="text"/> <input type="text"/> <input type="text"/> <input type="text"/> |       |        |         |        |       | 52b | <input type="text"/> <input type="text"/> <input type="text"/> <input type="text"/> |       |        |         |
| 53a | Chatting, reading, sitting, listening to music etc., | <input type="text"/> <input type="text"/> <input type="text"/> <input type="text"/> |       |        |         |        |       | 53b | <input type="text"/> <input type="text"/> <input type="text"/> <input type="text"/> |       |        |         |
| 54a | Others specify<br>_____                              | <input type="text"/> <input type="text"/> <input type="text"/> <input type="text"/> |       |        |         |        |       | 54b | <input type="text"/> <input type="text"/> <input type="text"/> <input type="text"/> |       |        |         |
| 55a | Others specify<br>_____                              | <input type="text"/> <input type="text"/> <input type="text"/> <input type="text"/> |       |        |         |        |       | 55b | <input type="text"/> <input type="text"/> <input type="text"/> <input type="text"/> |       |        |         |

**SECTION V – PHYSICAL ACTIVITY- WEEKEND ACTIVITY: List all the activities that you do in weekend and are not mentioned in the earlier**

|    |                                                                                                                                               |
|----|-----------------------------------------------------------------------------------------------------------------------------------------------|
| 56 | Week end includes<br>1 day -----1<br>1 ½ days----2<br>2 days -----3 <input type="checkbox"/> / Week<br>or<br>Days <input type="text"/> /month |
|----|-----------------------------------------------------------------------------------------------------------------------------------------------|

|    | WEEKEND –General Activity                                                             | Duration /day (Hrs: mins)                                                                          | Monthly (Indicate the frequency) |
|----|---------------------------------------------------------------------------------------|----------------------------------------------------------------------------------------------------|----------------------------------|
| 57 | Regular hours of sleep usually at night) and                                          | Night sleep<br><input type="text"/> <input type="text"/> <input type="text"/> <input type="text"/> |                                  |
| 58 | Nap(short break of sleep - day time)                                                  | Day sleep<br><input type="text"/> <input type="text"/> <input type="text"/> <input type="text"/>   |                                  |
| 59 | Cooking                                                                               | <input type="text"/> <input type="text"/> <input type="text"/> <input type="text"/>                |                                  |
| 60 | Collecting water/wood/climbing steps/walking uphill                                   | <input type="text"/> <input type="text"/> <input type="text"/> <input type="text"/>                |                                  |
| 61 | Non-mechanized domestic chores (example-sweeping, washing clothes and dishes by hand) | <input type="text"/> <input type="text"/> <input type="text"/> <input type="text"/>                |                                  |
| 62 | Toddler care (age <5 years includes feeding, bathing, playing etc.)                   | <input type="text"/> <input type="text"/> <input type="text"/> <input type="text"/>                |                                  |
| 63 | Personal care (brushing, toilet, showering, dressing etc.)                            | <input type="text"/> <input type="text"/> <input type="text"/> <input type="text"/>                |                                  |

\*Seasonal - Typically reflects changes in occupation due to monsoon or winter  
 \*\*Part-time - The second job

| <b>WEEKEND -Transport</b>                  |                                                                                                            | Duration /day<br>(Hrs: mins)                                                        | Monthly<br>(Indicate the frequency) |
|--------------------------------------------|------------------------------------------------------------------------------------------------------------|-------------------------------------------------------------------------------------|-------------------------------------|
| 64                                         | Self driving –work and other places (car/bike/scooter)                                                     | <input type="text"/> <input type="text"/> <input type="text"/> <input type="text"/> |                                     |
| 65                                         | Commuting by bus / auto /pillion rider (to work & other places)                                            | <input type="text"/> <input type="text"/> <input type="text"/> <input type="text"/> |                                     |
| 66                                         | Travel by cycling (excludes cycling as an exercise)                                                        | <input type="text"/> <input type="text"/> <input type="text"/> <input type="text"/> |                                     |
| 67                                         | Walking to and fro places (excludes walking as an exercise)                                                | <input type="text"/> <input type="text"/> <input type="text"/> <input type="text"/> |                                     |
| <b>WEEKEND – Leisure Light Activity</b>    |                                                                                                            | Duration /day<br>(Hrs: mins)                                                        | Monthly<br>(Indicate the frequency) |
| 68                                         | Slow walking (example- shopping, going to a worship place)                                                 | <input type="text"/> <input type="text"/> <input type="text"/> <input type="text"/> |                                     |
| 69                                         | Playing a musical instrument/ singing (as a hobby)                                                         | <input type="text"/> <input type="text"/> <input type="text"/> <input type="text"/> |                                     |
| <b>WEEKEND – Leisure Moderate Activity</b> |                                                                                                            | Duration /day<br>(Hrs: mins)                                                        | Monthly<br>(Indicate the frequency) |
| 70                                         | Brisk walking as an exercise                                                                               | <input type="text"/> <input type="text"/> <input type="text"/> <input type="text"/> |                                     |
| 71                                         | Cricket                                                                                                    | <input type="text"/> <input type="text"/> <input type="text"/> <input type="text"/> |                                     |
| 72                                         | Dancing / aerobics / yoga (asanam)                                                                         | <input type="text"/> <input type="text"/> <input type="text"/> <input type="text"/> |                                     |
| 73                                         | Swimming                                                                                                   | <input type="text"/> <input type="text"/> <input type="text"/> <input type="text"/> |                                     |
| 74                                         | Jogging / running                                                                                          | <input type="text"/> <input type="text"/> <input type="text"/> <input type="text"/> |                                     |
| 75                                         | Cycling including static cycling                                                                           | <input type="text"/> <input type="text"/> <input type="text"/> <input type="text"/> |                                     |
| <b>WEEKEND – Leisure Vigorous Activity</b> |                                                                                                            | Duration /day<br>(Hrs: mins)                                                        | Monthly<br>(Indicate the frequency) |
| 76                                         | Conditioning exercises e.g. muscle strengthening exercises like using a rowing machine / free weights etc. | <input type="text"/> <input type="text"/> <input type="text"/> <input type="text"/> |                                     |
| 77                                         | Running / sprinting                                                                                        | <input type="text"/> <input type="text"/> <input type="text"/> <input type="text"/> |                                     |
| 78                                         | Football, basket ball, tennis, volleyball etc.,                                                            | <input type="text"/> <input type="text"/> <input type="text"/> <input type="text"/> |                                     |

\*Seasonal - Typically reflects changes in occupation due to monsoon or winter  
\*\*Part-time - The second job

| <b>WEEKEND – Leisure Sedentary Activity</b> |                                                      | Duration /day<br>(Hrs: mins)                                                        | Monthly<br>(Indicate the frequency) |
|---------------------------------------------|------------------------------------------------------|-------------------------------------------------------------------------------------|-------------------------------------|
| 79                                          | Watching TV                                          | <input type="text"/> <input type="text"/> <input type="text"/> <input type="text"/> |                                     |
| 80                                          | Bhajans/Prayer at temple                             | <input type="text"/> <input type="text"/> <input type="text"/> <input type="text"/> |                                     |
| 81                                          | Watching movies at theatre                           | <input type="text"/> <input type="text"/> <input type="text"/> <input type="text"/> |                                     |
| 82                                          | Yoga as relaxation                                   | <input type="text"/> <input type="text"/> <input type="text"/> <input type="text"/> |                                     |
| 83                                          | Chatting, reading, sitting, listening to music etc., | <input type="text"/> <input type="text"/> <input type="text"/> <input type="text"/> |                                     |
| <b>WEEKEND – Leisure Other Activity</b>     |                                                      | Duration /day<br>(Hrs: mins)                                                        | Monthly<br>(Indicate the frequency) |
| 84                                          | -----<br>-----                                       | <input type="text"/> <input type="text"/> <input type="text"/> <input type="text"/> |                                     |
| 85                                          | -----<br>-----                                       | <input type="text"/> <input type="text"/> <input type="text"/> <input type="text"/> |                                     |
| 86                                          | -----<br>-----                                       | <input type="text"/> <input type="text"/> <input type="text"/> <input type="text"/> |                                     |
| 87                                          | -----<br>-----                                       | <input type="text"/> <input type="text"/> <input type="text"/> <input type="text"/> |                                     |
| 88                                          | <b>COMMENTS:</b>                                     |                                                                                     |                                     |

Interviewer name and code -----

Verified & Approved by (Field Supervisors):-----

Date keyed on: -----

---

\*Seasonal - Typically reflects changes in occupation due to monsoon or winter  
 \*\*Part-time - The second job
